# Supplementary material
Source: PubMed Central journal article supplement (PMC4101086)
Supplement: NIHMS576616-supplement-Supplementary_Material.pdf [file NIHMS576616-supplement-Supplementary_Material.pdf]

## Supplementary Material for Reduced rank regression via adaptive nuclear norm penalization

BY KUN CHEN

*Department of Statistics, Kansas State University, Manhattan, Kansas 66506, U.S.A.*  
kunchen@ksu.edu

HONGBO DONG

*Wisconsin Institutes for Discovery, University of Wisconsin,  
330 N. Orchard St., Madison, Wisconsin 53715, U.S.A.*  
hdong6@wisc.edu

AND KUNG-SIK CHAN

*Department of Statistics and Actuarial Science, University of Iowa,  
Iowa City, Iowa 52242, U.S.A.*  
kung-sik-chan@uiowa.edu

### 1. ADDITIONAL SIMULATION RESULTS

In our paper, we have presented simulation results for the proposed adaptive nuclear norm penalized estimator  $\hat{C}_S^{(\lambda w)}$  with  $\gamma = 2$  and  $\gamma = 0$ . Here we show the results for  $\gamma = 1$ . The optimally tuned  $\hat{C}_S^{(\lambda w)}$  with  $\gamma = 2$  is also included for reference and ease of comparison.

In our paper, all the simulation results are for the optimally tuned reduced rank estimators. Here we show some results obtained from ten-fold cross validation, to demonstrate that they are similar to or slightly worse than those from the optimal tuning procedure.

Table 1. Additional simulation results using Model I. The estimation and prediction errors are reported along with their standard errors in parentheses.

| $b$          |      | $\hat{C}_S(2)$ | $\hat{C}_S(1)$ | $\hat{C}_S^{cv}(2)$ | $\hat{C}_S^{cv}(1)$ | $\hat{C}_H^{cv}$ |
|--------------|------|----------------|----------------|---------------------|---------------------|------------------|
| $\rho = 0.9$ |      |                |                |                     |                     |                  |
| 0.05         | Est  | 2.6 (0.4)      | 2.5 (0.4)      | 2.7 (0.5)           | 2.5 (0.4)           | 3.2 (0.7)        |
|              | Pred | 9.9 (1.0)      | 9.7 (1.0)      | 10.2 (1.1)          | 9.9 (1.0)           | 12.7 (1.6)       |
|              | Rank | 5.5, 0%        | 6.7, 0%        | 4.9, 0%             | 6.2, 0%             | 3.1, 0%          |
| 0.1          | Est  | 4.5 (0.5)      | 4.3 (0.5)      | 4.6 (0.6)           | 4.3 (0.5)           | 5.7 (0.8)        |
|              | Pred | 13.5 (1.2)     | 13.2 (1.1)     | 13.8 (1.2)          | 13.3 (1.1)          | 16.6 (1.6)       |
|              | Rank | 8.1, 5%        | 9.2, 33%       | 7.6, 2%             | 8.8, 19%            | 5.1, 0%          |
| 0.3          | Est  | 6.2 (0.7)      | 6.1 (0.7)      | 6.3 (0.7)           | 6.2 (0.7)           | 6.9 (0.8)        |
|              | Pred | 15.1 (1.2)     | 15.9 (1.2)     | 16.1 (1.2)          | 15.9 (1.2)          | 17.1 (1.4)       |
|              | Rank | 10.3, 64%      | 11.2, 11%      | 10.1, 74%           | 10.9, 27%           | 9.7, 68%         |
| $\rho = 0.5$ |      |                |                |                     |                     |                  |
| 0.05         | Est  | 0.9 (0.1)      | 0.9 (0.1)      | 0.9 (0.1)           | 0.9 (0.1)           | 1.2 (0.1)        |
|              | Pred | 13.6 (1.2)     | 12.1 (1.1)     | 13.8 (1.3)          | 13.1 (1.2)          | 17.8 (2.0)       |
|              | Rank | 8.0, 5%        | 9.2, 30%       | 7.6, 2%             | 8.9, 20%            | 5.6, 0%          |
| 0.1          | Est  | 1.2 (0.1)      | 1.1 (0.1)      | 1.2 (0.1)           | 1.1 (0.1)           | 1.4 (0.2)        |
|              | Pred | 15.7 (1.1)     | 15.4 (1.1)     | 15.9 (1.2)          | 15.5 (1.1)          | 17.8 (1.5)       |
|              | Rank | 10.0, 58%      | 10.1, 24%      | 9.8, 56%            | 10.8, 34%           | 8.9, 25%         |
| 0.3          | Est  | 1.2 (0.1)      | 1.2 (0.1)      | 1.2 (0.1)           | 1.2 (0.1)           | 1.3 (0.1)        |
|              | Pred | 15.9 (1.2)     | 16.0 (1.2)     | 16.0 (1.2)          | 16.1 (1.2)          | 16.2 (1.2)       |
|              | Rank | 10.2, 80%      | 11.0, 17%      | 10.1, 90%           | 10.6, 50%           | 10.0, 99%        |
| $\rho = 0.1$ |      |                |                |                     |                     |                  |
| 0.05         | Est  | 0.7 (0.1)      | 0.7 (0.1)      | 0.7 (0.1)           | 0.7 (0.1)           | 0.9 (0.1)        |
|              | Pred | 14.1 (1.2)     | 13.5 (1.1)     | 14.4 (1.3)          | 13.7 (1.1)          | 18.2 (1.8)       |
|              | Rank | 8.5, 12%       | 9.6, 40%       | 7.1, 6%             | 9.2, 29%            | 6.2, 0%          |
| 0.1          | Est  | 0.8 (0.1)      | 0.8 (0.1)      | 0.8 (0.1)           | 0.8 (0.1)           | 0.9 (0.1)        |
|              | Pred | 15.9 (1.2)     | 15.6 (1.2)     | 16.0 (1.2)          | 15.7 (1.2)          | 17.6 (1.4)       |
|              | Rank | 10.2, 64%      | 11.1, 15%      | 9.9, 65%            | 10.9, 31%           | 9.3, 40%         |
| 0.3          | Est  | 0.8 (0.1)      | 0.8 (0.1)      | 0.8 (0.1)           | 0.8 (0.1)           | 0.8 (0.1)        |
|              | Pred | 15.1 (1.2)     | 16.0 (1.2)     | 16.1 (1.2)          | 16.1 (1.2)          | 16.2 (1.2)       |
|              | Rank | 10.2, 83%      | 10.9, 17%      | 10.1, 88%           | 10.7, 48%           | 10.0, 99%        |
| Time         |      | 0.15           | 0.15           | 0.18                | 0.18                | 0.02             |

$\hat{C}_S(\gamma)$ : optimally tuned adaptive nuclear norm penalized estimator with weight parameter  $\gamma$ ;  $\hat{C}_S^{cv}(\gamma)$ : adaptive nuclear norm penalized estimator with weight parameter  $\gamma$  tuned by cross validation;  $\hat{C}_H^{cv}$ , rank penalized estimator tuned by cross validation; Est, estimation error; Pred, prediction error; Rank, average of estimated rank and percentage of correct rank identification; Time, average computation time in seconds per simulation run.

Table 2. Additional simulation results using Model II. The layout of the table is the same as in Table 1.

| $b$          |      | $\hat{C}_S(2)$ | $\hat{C}_S(1)$ | $\hat{C}_S^{cv}(2)$ | $\hat{C}_S^{cv}(1)$ | $\hat{C}_H^{cv}$ |
|--------------|------|----------------|----------------|---------------------|---------------------|------------------|
| $\rho = 0.9$ |      |                |                |                     |                     |                  |
| 0.05         | Est  | 1.2 (0.2)      | 1.2 (0.2)      | 1.2 (0.2)           | 1.2 (0.2)           | 1.2 (0.2)        |
|              | Pred | 29.1 (3.5)     | 28.9 (3.4)     | 29.6 (3.5)          | 29.4 (3.4)          | 32.3 (4.6)       |
|              | Rank | 5.2, 71%       | 5.7, 36%       | 4.10, 73%           | 5.4, 56%            | 4.6, 64%         |
| 0.1          | Est  | 4.5 (0.7)      | 4.5 (0.7)      | 4.5 (0.7)           | 4.5 (0.7)           | 4.5 (0.7)        |
|              | Pred | 30.0 (3.6)     | 30.1 (3.7)     | 30.4 (3.8)          | 30.5 (3.8)          | 31.0 (3.8)       |
|              | Rank | 5.2, 79%       | 5.6, 43%       | 5.1, 87%            | 5.5, 60%            | 4.1, 97%         |
| 0.3          | Est  | 40.6 (5.9)     | 40.6 (5.9)     | 40.6 (5.9)          | 40.6 (5.9)          | 40.6 (5.9)       |
|              | Pred | 30.1 (3.5)     | 30.2 (3.5)     | 30.3 (3.6)          | 30.4 (3.6)          | 30.2 (3.6)       |
|              | Rank | 5.2, 82%       | 5.5, 56%       | 5.2, 87%            | 5.3, 75%            | 5.0, 100%        |
| $\rho = 0.5$ |      |                |                |                     |                     |                  |
| 0.05         | Est  | 1.1 (0.2)      | 1.1 (0.2)      | 1.1 (0.2)           | 1.1 (0.2)           | 1.1 (0.2)        |
|              | Pred | 29.1 (3.6)     | 29.1 (3.6)     | 29.6 (3.8)          | 29.4 (3.7)          | 31.6 (4.2)       |
|              | Rank | 5.2, 77%       | 5.7, 38%       | 5.1, 79%            | 5.4, 63%            | 4.8, 78%         |
| 0.1          | Est  | 4.5 (0.6)      | 4.5 (0.6)      | 4.5 (0.6)           | 4.5 (0.6)           | 4.5 (0.6)        |
|              | Pred | 29.6 (3.3)     | 29.7 (3.4)     | 29.9 (3.6)          | 30.0 (3.5)          | 30.3 (3.6)       |
|              | Rank | 5.2, 81%       | 5.6, 42%       | 5.1, 90%            | 5.4, 70%            | 4.1, 98%         |
| 0.3          | Est  | 40.1 (6.0)     | 40.1 (6.0)     | 40.1 (6.0)          | 40.1 (6.0)          | 40.1 (6.0)       |
|              | Pred | 30.2 (3.1)     | 30.3 (3.1)     | 30.4 (3.1)          | 30.5 (3.1)          | 30.3 (3.1)       |
|              | Rank | 5.2, 78%       | 5.5, 57%       | 5.1, 89%            | 5.2, 81%            | 5.0, 100%        |
| $\rho = 0.1$ |      |                |                |                     |                     |                  |
| 0.05         | Est  | 1.1 (0.2)      | 1.1 (0.2)      | 1.1 (0.2)           | 1.1 (0.2)           | 1.1 (0.2)        |
|              | Pred | 29.3 (3.5)     | 29.2 (3.5)     | 29.7 (3.6)          | 29.5 (3.5)          | 31.9 (4.5)       |
|              | Rank | 5.2, 76%       | 5.7, 35%       | 5.1, 79%            | 5.5, 57%            | 4.8, 77%         |
| 0.1          | Est  | 4.5 (0.7)      | 4.5 (0.7)      | 4.5 (0.7)           | 4.5 (0.7)           | 4.5 (0.7)        |
|              | Pred | 29.7 (3.5)     | 29.8 (3.5)     | 30.0 (3.5)          | 30.1 (3.5)          | 30.3 (3.7)       |
|              | Rank | 5.2, 79%       | 5.6, 43%       | 5.1, 89%            | 5.4, 67%            | 4.10, 99%        |
| 0.3          | Est  | 40.5 (5.6)     | 40.5 (5.6)     | 40.5 (5.6)          | 40.5 (5.6)          | 40.5 (5.6)       |
|              | Pred | 29.1 (3.4)     | 30.1 (3.4)     | 30.3 (3.5)          | 30.3 (3.5)          | 30.1 (3.5)       |
|              | Rank | 5.2, 76%       | 5.5, 55%       | 5.2, 87%            | 5.3, 79%            | 5.0, 100%        |
| Time         |      | 0.15           | 0.15           | 0.26                | 0.26                | 0.08             |
